# Supplementary material
Source: Springer Nature journal article supplement (https://www.springermedizin.de/resource/supplementary/13613_2011_1_MOESM3_ESM.pdf/15427238)
Supplement: MOESM3 [file 15427238]

Airway pressure  
(cm H<sub>2</sub>O)

40  
0

15-sec  
EEO  
↔

cyclic  $\nabla$  in  
cardiac preload

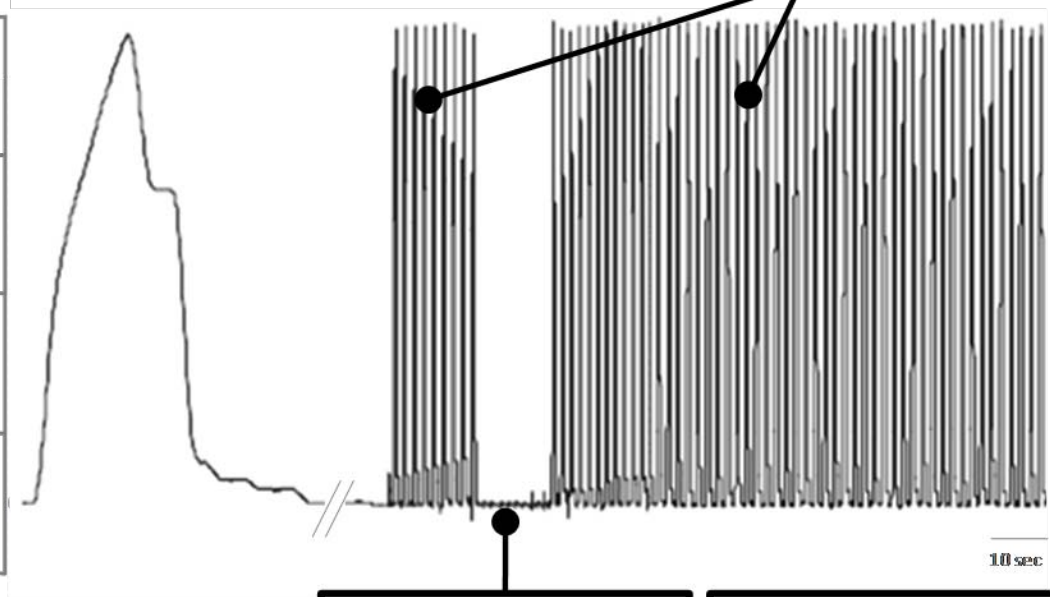

↗ in cardiac preload

= test for fluid responsiveness
